# Supplementary material for: Synthesis of nanoscaled poly(styrene-co-n-butyl acrylate)/silica particles with dumbbell- and snowman-like morphologies by emulsion polymerization
Source: Royal Society of Chemistry journal article supplement (doi:10.1039/c4py00370e), 2014-01-01
Supplement: c4py00370e1.pdf [file c4py00370e1.pdf]

## SUPPORTING INFORMATION

**Table S1.** Characteristics of the Ludox<sup>®</sup> TM-50 aqueous colloidal silica sol.

| [SiO <sub>2</sub> ]<br>(wt. % / g L <sup>-1</sup> ) <sup>a</sup> | $D_n$ (nm) /<br>$D_w/D_n$ <sup>b</sup> | pH      | $\rho_{\text{silica}}$ (g<br>cm <sup>-3</sup> ) | Specific surface area<br>(m <sup>2</sup> g <sup>-1</sup> ) <sup>c</sup> |
|------------------------------------------------------------------|----------------------------------------|---------|-------------------------------------------------|-------------------------------------------------------------------------|
| 50 / 550                                                         | 27 / 1.07                              | 9 ± 0.1 | 2.3 <sup>d</sup>                                | 118                                                                     |

<sup>a</sup>Determined by gravimetric analysis. <sup>b</sup>Number-average diameter and polydispersity index determined by TEM by counting more than 200 particles. The weight average diameter,  $D_w$ , was calculated from:

$D_w = \frac{\sum n_i D_i^4}{\sum n_i D_i^3}$ , where  $n_i$  designates the number of particles of diameter  $D_i$ . <sup>c</sup>Supplier data record.

$$\rho_{\text{silica}} = \frac{W_{\text{silica}}}{\frac{1}{\rho_{\text{Ludox}}} - W_{\text{water}}}$$

<sup>d</sup> Determined according to : where  $W_{\text{silica}}$  and  $W_{\text{water}}$  are weight fractions of silica and water, respectively ( $W_{\text{silica}} = W_{\text{water}} = 0.5$ ) and  $\rho_{\text{Ludox}}$  is the density of the Ludox suspension as given by the manufacturer ( $\rho_{\text{Ludox}} = 1.4 \text{ g cm}^{-3}$ )

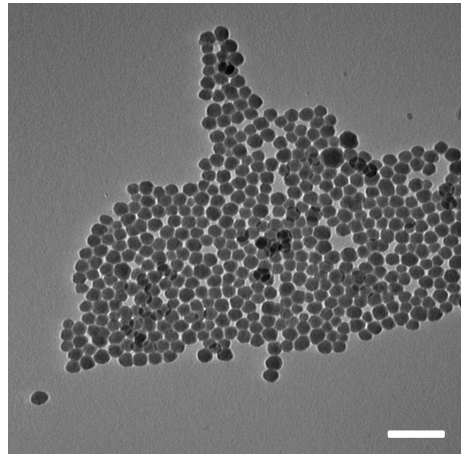

**Figure S1.** TEM image of the colloidal silica sol used in this study. Scale bar: 100 nm.

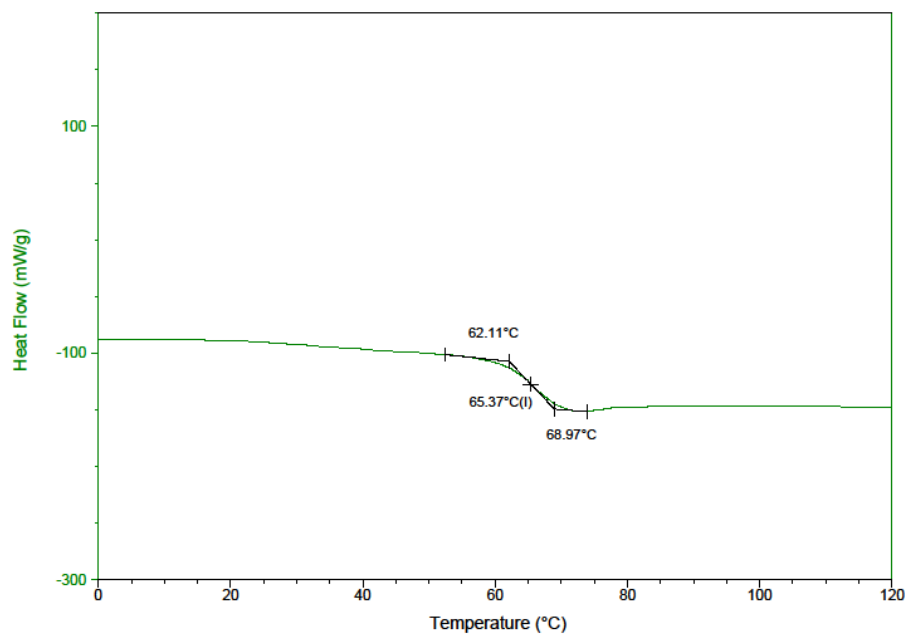

**Figure S2.** DSC thermogram of latex particles obtained in run 2. [Sty] = 12.8 g L<sup>-1</sup>, [BuA] = 3.3 g L<sup>-1</sup>, [DVB] = 0.2 g L<sup>-1</sup>, [SDS] = 0.5 g L<sup>-1</sup>, [SSNa] = 0.60 g L<sup>-1</sup> and [KPS] = 0.70 g L<sup>-1</sup>.

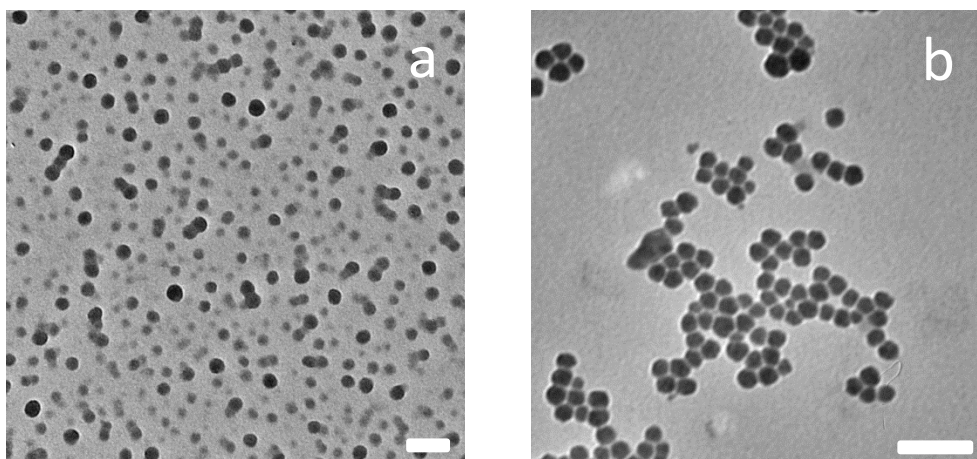

**Figure S3.** TEM image of the latex particles obtained when: (a)  $[\text{Sty}] = 10.3 \text{ g L}^{-1}$ ,  $[\text{BuA}] = 3.3 \text{ g L}^{-1}$ ,  $[\text{DVB}] = 3 \text{ g L}^{-1}$ ,  $[\text{SDS}] = 0.5 \text{ g L}^{-1}$ ,  $[\text{SSNa}] = 0.60 \text{ g L}^{-1}$  and  $[\text{KPS}] = 0.70 \text{ g L}^{-1}$  (run 1). (b)  $[\text{Sty}] = 12.8 \text{ g L}^{-1}$ ,  $[\text{BuA}] = 3.3 \text{ g L}^{-1}$ ,  $[\text{DVB}] = 0.2 \text{ g L}^{-1}$ ,  $[\text{SDS}] = 0.5 \text{ g L}^{-1}$ ,  $[\text{SSNa}] = 0.60 \text{ g L}^{-1}$  and  $[\text{KPS}] = 0.70 \text{ g L}^{-1}$  (run 2). Scale bar: 100 nm.

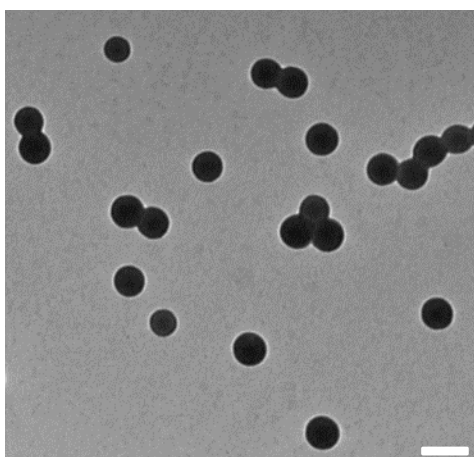

**Figure S4.** TEM image of the latex particles obtained when  $[\text{Sty}] = 43 \text{ g L}^{-1}$ ,  $[\text{BuA}] = 11 \text{ g L}^{-1}$ ,  $[\text{DVB}] = 0.5 \text{ g L}^{-1}$ ,  $[\text{SDS}] = 1.5 \text{ g L}^{-1}$  and  $[\text{KPS}] = 0.25 \text{ g L}^{-1}$  (run 13, Table 2). Scale bar: 100 nm.

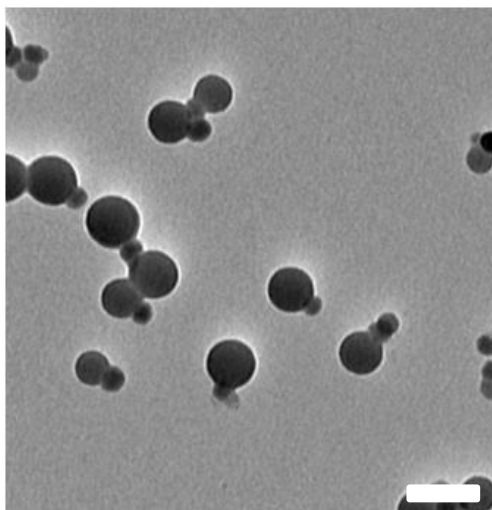

**Figure S5.** TEM images of Ludox<sup>®</sup> TM-50 silica/P(Sty-*co*-BuA) biphasic particles obtained for [SDS] = 1 g L<sup>-1</sup>, [Sty] = 43 g L<sup>-1</sup>, [BuA] = 11 g L<sup>-1</sup>, [DVB] = 0.5 g L<sup>-1</sup>, [ $\gamma$ -MPS] = 1.5  $\mu$ mol m<sup>-2</sup>, [KPS] = 0.25 g L<sup>-1</sup> and [SiO<sub>2</sub>] = 13 g L<sup>-1</sup> (run 21, Table 2). Scale bar: 100 nm
